# Supplementary material for: The Nine-Item Internet Gaming Disorder Scale (IGDS9-SF): Its Psychometric Properties among Sri Lankan Students and Measurement Invariance across Sri Lanka, Turkey, Australia, and the USA
Source: MDPI journal article supplement (doi:10.3390/healthcare10030490), 2022-03-07
Supplement: s1 [file s1]

**Table S1.** Invariance of the IGD-SF9 across different groups among university students from Sri Lanka

| Groups                        | Invariance Levels | $\chi^2$ | df  | $p$   | $\Delta\chi^2$ | $\Delta df$ | $p(\Delta\chi^2)$ | CFI  | $\Delta CFI$ | TLI  | $\Delta TLI$ | RMSEA | $\Delta RMSEA$ | SRMR   |
|-------------------------------|-------------------|----------|-----|-------|----------------|-------------|-------------------|------|--------------|------|--------------|-------|----------------|--------|
| Gender                        | Configural        | 76.766   | 54  | 0.023 |                |             |                   | .963 |              | .951 |              | .036  |                | 0.0390 |
|                               | Metric            | 83.651   | 62  | .035  | 6.885          | 8           | 0.549             | .965 | -0.002       | .959 | -0.008       | .033  | 0.003          | 0.0463 |
|                               | Strong            | 85.846   | 63  | .029  | 2.195          | 1           | .138              | .963 | 0.002        | .958 | 0.001        | .034  | -0.001         | 0.0571 |
|                               | Strict            | 120.844  | 72  | .000  | 34.997         | 9           | .001              | .921 | <b>0.042</b> | .921 | <b>0.037</b> | .046  | -0.012         | 0.0464 |
| Ethnicity                     | Configural        | 84.134   | 54  | .005  |                |             |                   | .954 |              | .939 |              | .042  |                | 0.0430 |
|                               | Metric            | 90.936   | 62  | .010  | 6.802          | 8           | 0.558             | .956 | -0.002       | .949 | 0.010        | .038  | 0.004          | 0.0436 |
|                               | Strong            | 92.457   | 63  | .009  | 1.522          | 1           | .217              | .955 | 0.001        | .949 | 0.000        | .038  | 0.000          | 0.0447 |
|                               | Strict            | 98.823   | 72  | .020  | 6.365          | 9           | .703              | .959 | -0.004       | .959 | 0.010        | .034  | 0.004          | 0.0453 |
| Language of the questionnaire | Configural        | 83.561   | 54  | .006  |                |             |                   | .956 |              | .942 |              | .041  |                | 0.0520 |
|                               | Metric            | 86.519   | 62  | .022  | 2.959          | 8           | 0.937             | .964 | -0.008       | .958 | -0.016       | .035  | 0.006          | 0.0529 |
|                               | Strong            | 91.431   | 63  | .011  | 4.912          | 1           | .027              | .958 | 0.006        | .952 | 0.006        | .038  | -0.003         | 0.0661 |
|                               | Strict            | 101.047  | 72  | .014  | 9.616          | 9           | .382              | .957 | 0.001        | .957 | -0.005       | .036  | 0.002          | 0.0685 |
| Academic major                | Configural        | 181.809  | 144 | .018  |                |             |                   | .945 |              | .945 |              | .029  |                | 0.0846 |
|                               | Metric            | 197.609  | 152 | .008  | 15.800         | 8           | 0.045             | .934 | 0.011        | .937 | 0.008        | .031  | -0.003         | .0920  |
|                               | Strong            | 200.649  | 153 | .006  | 3.039          | 1           | 0.081             | .931 | 0.003        | .935 | 0.002        | .032  | -0.001         | .0987  |
|                               | Strict            | 230.161  | 162 | .000  | 29.512         | 9           | .001              | .901 | 0.030        | .912 | 0.023        | .037  | -0.005         | .1035  |
| Household income              | Configural        | 124.237  | 99  | 0.044 |                |             |                   | .963 |              | .960 |              | .028  |                | 0.0680 |
|                               | Metric            | 147.471  | 107 | .006  | 23.234         | 8           | 0.003             | .941 | <b>0.022</b> | .940 | <b>0.020</b> | .034  | 0.008          | 0.0843 |
|                               | Strong            | 147.546  | 108 | .007  | 0.075          | 1           | .785              | .942 | -0.001       | .942 | -0.002       | .034  | -0.004         | 0.0862 |

|           |            |         |     |      |        |   |       |      |              |      |              |      |        |               |
|-----------|------------|---------|-----|------|--------|---|-------|------|--------------|------|--------------|------|--------|---------------|
|           | Strict     | 168.628 | 117 | .001 | 21.082 | 9 | .012  | .925 | 0.017        | .930 | 0.012        | .037 | -0.003 | 0.0741        |
| Device    | Configural | 65.723  | 54  | .132 |        |   |       | .982 |              | .976 |              | .026 |        | 0.0392        |
|           | Metric     | 76.295  | 62  | .105 | 10.572 | 8 | 0.227 | .978 | 0.004        | .975 | 0.001        | .027 | -0.001 | 0.0430        |
|           | Strong     | 76.567  | 63  | .117 | 0.272  | 1 | .602  | .980 | -0.002       | .977 | -0.002       | .026 | 0.001  | 0.0430        |
|           | Strict     | 83.104  | 72  | .174 | 6.537  | 9 | .685  | .983 | -0.003       | .983 | -0.006       | .022 | 0.004  | 0.0448        |
| Game type | Configural | 150.916 | 99  | .001 |        |   |       | .923 |              | .916 |              | .041 |        | 0.0782        |
|           | Metric     | 158.040 | 107 | .001 | 7.124  | 8 | 0.523 | .925 | -0.002       | .924 | -0.008       | .039 | 0.002  | 0.0862        |
|           | Strong     | 158.178 | 108 | .001 | 0.138  | 1 | .710  | .926 | -0.001       | .926 | -0.002       | .038 | 0.001  | 0.0860        |
|           | Strict     | 186.206 | 117 | .000 | 28.028 | 9 | .001  | .898 | <b>0.028</b> | .906 | <b>0.020</b> | .043 | -0.005 | <b>0.0931</b> |

$\chi^2$ , chi-square; df, degrees of freedom; CFI, comparative fit index; TLI, Tucker–Lewis index; RMSEA, root mean square error of approximation; SRMR, standardized root mean residual.
